# Supplementary material
Source: Springer Nature journal article supplement (https://www.springermedizin.de/resource/supplementary/12916_2011_493_MOESM3_ESM.pdf/9597938)

Low Carb Diet Fat Free Diet Gluten Free Diet

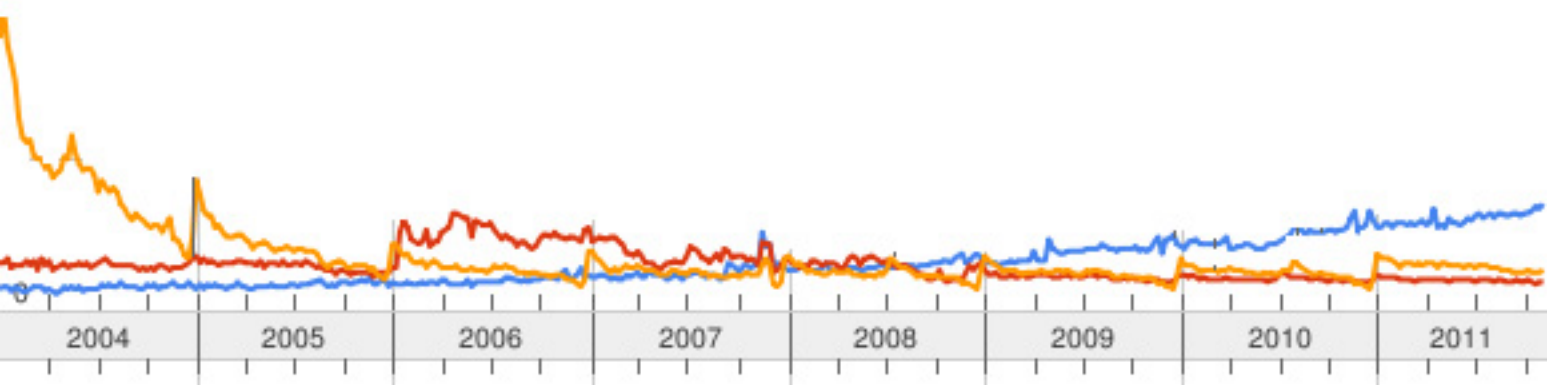

Supplement: MOESM3 [file 9597938]
